# Supplementary material for: A bioinspired multifunctional hydrogel patch targeting inflammation and regeneration in chronic intestinal wounds
Source: Royal Society of Chemistry journal article supplement (doi:10.1039/d1bm00118c), 2021-01-01
Supplement: d1bm00118c1.pdf [file d1bm00118c1.pdf]

## Supplementary Information

# A bioinspired multifunctional hydrogel patch targeting inflammation and regeneration in chronic intestinal wounds

Marco Araújo,<sup>\*a,b</sup> João Silveira,<sup>a,b,c</sup> Aureliana Sousa,<sup>a,b</sup> Mafalda Bessa-Gonçalves,<sup>a,b,d</sup> Susana G. Santos<sup>a,b,d</sup> and Cristina C. Barrias,<sup>\*a,b,d</sup>

<sup>a</sup> *i3S - Instituto de Inovação e Investigação em Saúde, Universidade do Porto, Porto, Portugal*

<sup>b</sup> *INEB - Instituto de Engenharia Biomédica, Universidade do Porto, Porto, Portugal*

<sup>c</sup> *FEUP – Faculdade de Engenharia, Universidade do Porto, Porto, Portugal*

<sup>d</sup> *ICBAS - Instituto de Ciências Biomédicas Abel Salazar, Universidade do Porto, Porto, Portugal*

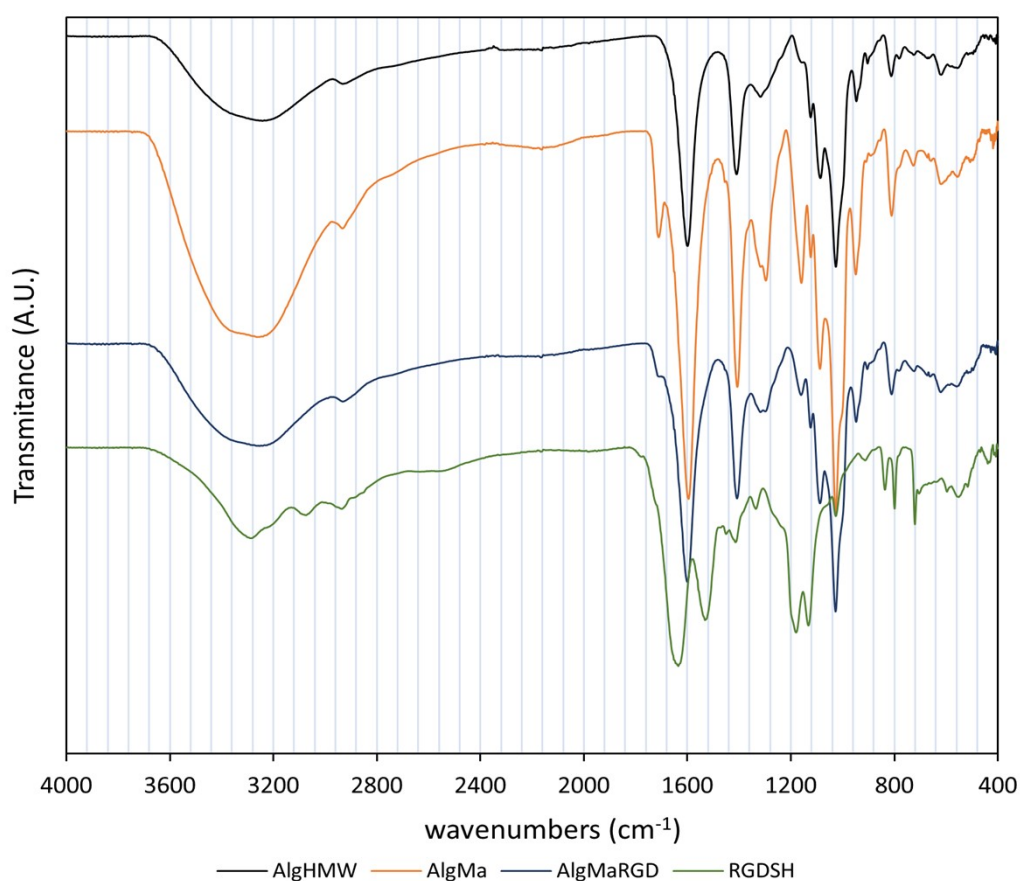

**Figure S1.** ATR-FTIR spectrum of alginate samples before (**AlgHMW**) and after modification with methacrylic anhydride (**AlgMa**) and grafting of the cell-adhesive peptide (**AlgMaRGD**). ATR-FTIR spectrum of cell-adhesive peptide CGGGGRGDSP (**RGDSH**).

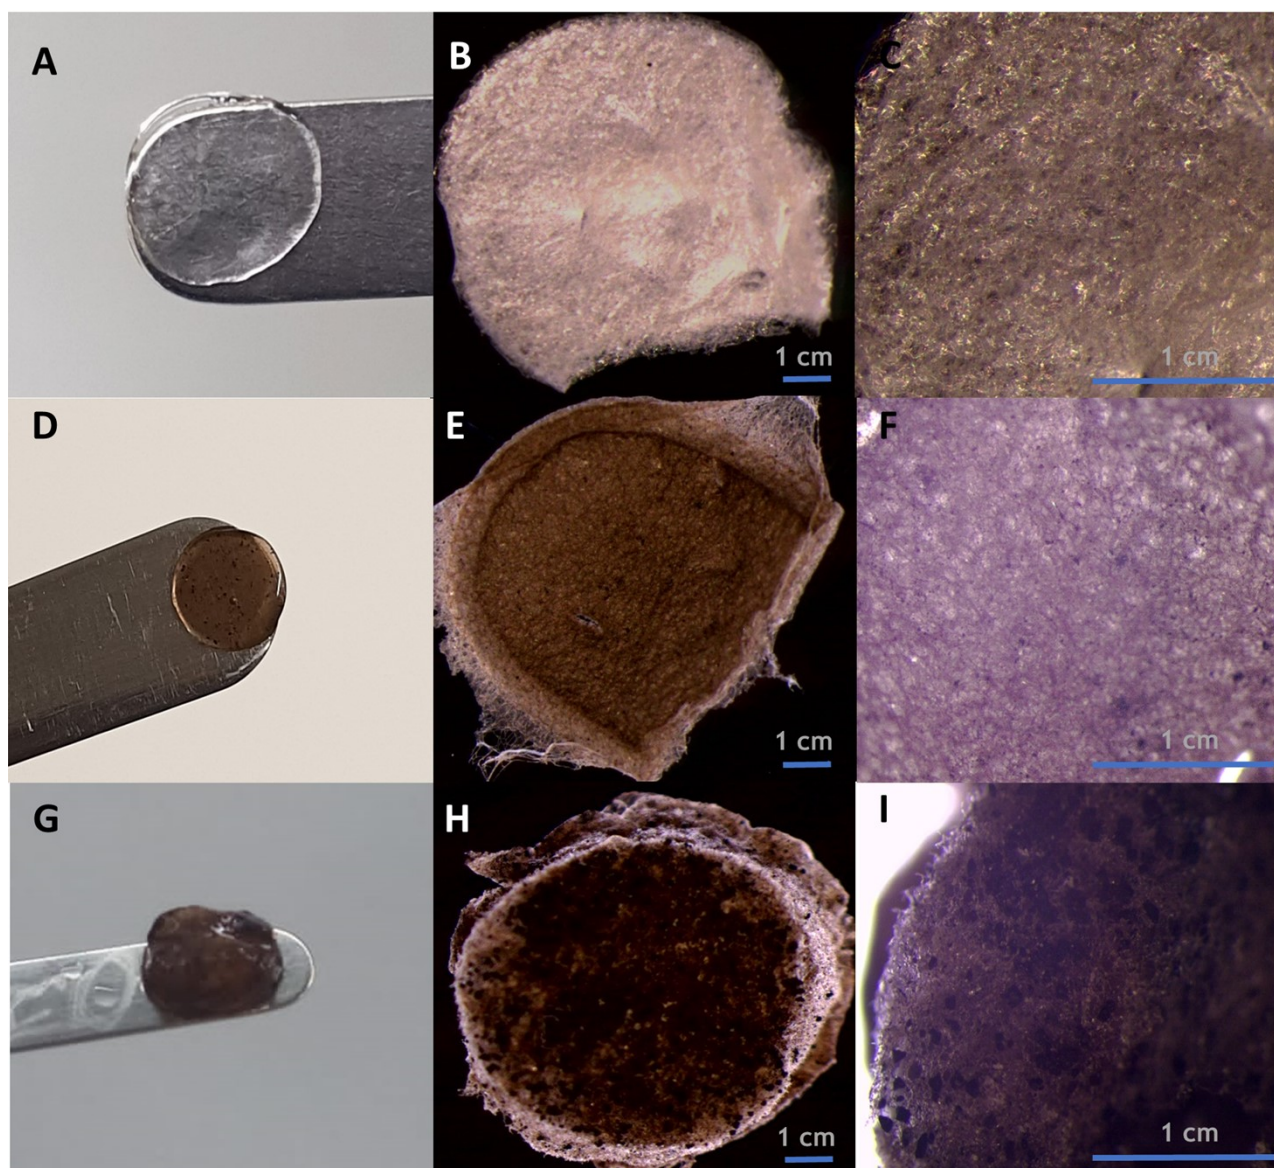

**Figure S2.** Macroscopic aspect of hydrogel formulations **Pep4** (A) and **mNP0.3Pep4** (D, G) and representative images of the spongy-like appearance of freeze-dried **Pep4** (B, C) and **mNP0.3Pep4** (D-I) scaffolds obtained from 14  $\mu\text{L}$  (A-F) and 80  $\mu\text{L}$  (G-I) of precursor solution. It is well observed the 3D aspect of the spongy scaffolds and the presence of mNP.

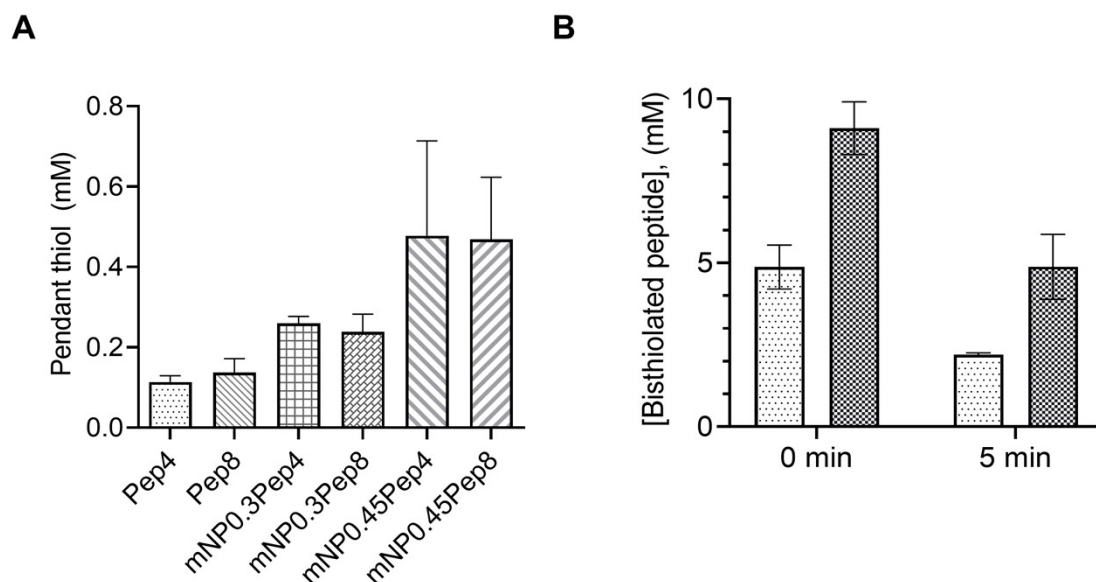

**Figure S3.** A: Concentration of pendant thiol groups on hydrogel matrices containing 4 mM and 8 mM of bisthiolated MMP-cleavable peptide without mNP (**Pep4**, **Pep8**), with 0.3 mNP (**mNP0.3Pep4** and **mNP0.3Pep8**) and 0.45 mNP (**mNP0.45Pep4** and **mNP0.45Pep8**). B: Amount of bisthiolated peptide in 4 mM and 8 mM solutions containing 0.05 wt% Irgacure 2959 before (0 min) and after photopolymerization (5 min).

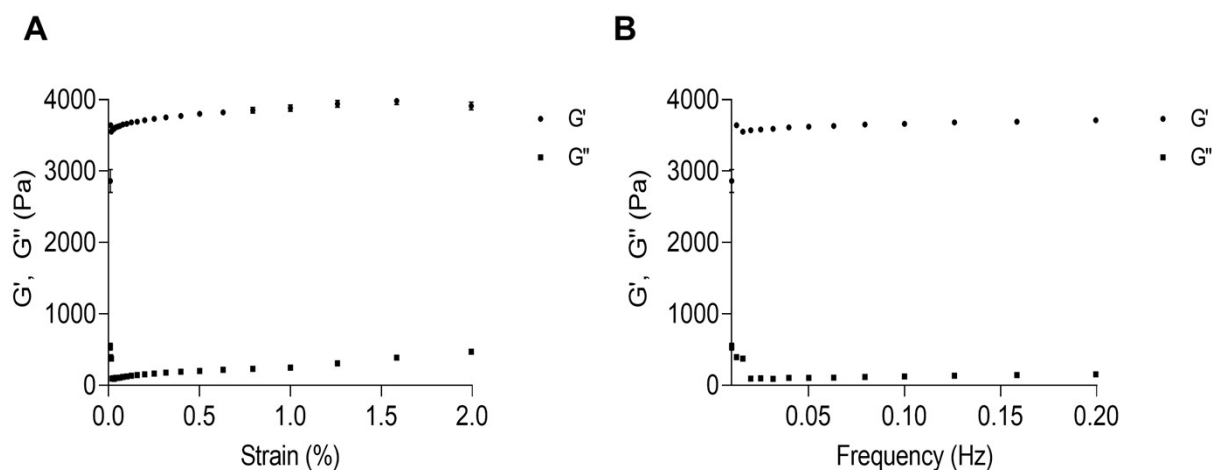

**Figure S4.** Strain-sweep (A) and frequency-sweep (B) tests performed on sample **mNP0.3Pep4**. Analysis were performed from 0.1-100% at 0.1 Hz frequency and from 0.01-10Hz maintaining 1% strain, which are both in the linear viscoelastic region.

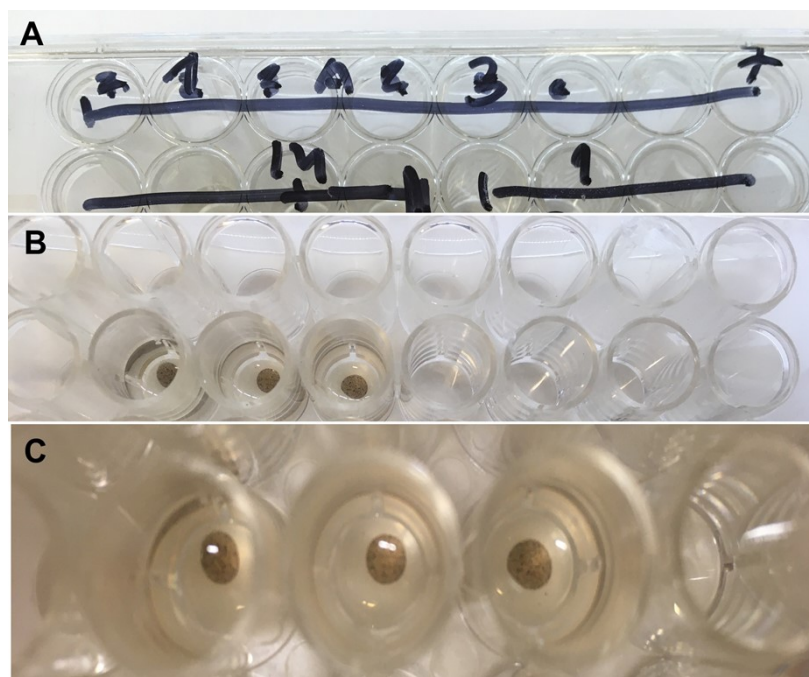

**Figure S5.** Layout of the 48-well plate (A) containing **mNP0.3Pep4** hydrogel samples incubated in a cocktail solution composed by Collagenase type II + Collagenase type IV (10U + 200U), at 37 °C and along 14 days (B). Amplified photo of the **mNP0.3Pep4** hydrogels (C).

**Video S1.** 3D rotating projection of HIFs and Caco-2 co-culture

[Supplementary movie 1.mov](#)
